# Supplementary material for: Crystal Structure of the Hendra Virus Attachment G Glycoprotein Bound to a Potent Cross-Reactive Neutralizing Human Monoclonal Antibody
Source: PubMed Central journal article supplement (PMC3795035; doi:10.1371/journal.ppat.1003684), 2013-10-10

20 40

|                             |            |            |           |            |            |    |
|-----------------------------|------------|------------|-----------|------------|------------|----|
| gi 29432477 gb AAC83193.2   | MMADSKLVSL | NNNLSGKIKD | QGKVIKNNY | TMDIKKINDG | LLDSKILGAF | 50 |
| gi 328495173 gb AEB21198.1  | MMADSKLVSL | NNNLSGKIKD | QGKVIKNNY | TMDIKKINDG | LLDSKILGAF | 50 |
| gi 328495213 gb AEB21234.1  | MMADSKLVSL | NNNLSGKIKD | QGKVIKNNY | TMDIKKINDG | LLDSKILGAF | 50 |
| gi 350998758 gb AEQ38062.1  | MMADSKLVSL | NNNLSGKIKD | QGKVIKNNY | TMDIKKINDG | LLDSKILGAF | 50 |
| gi 350998768 gb AEQ38071.1  | MMADSKLVSL | NNNLSGKIKD | QGKVIKNNY | TMDIKKINDG | LLDSKILGAF | 50 |
| gi 350998778 gb AEQ38080.1  | MMADSKLVSL | NNNLSGKIKD | QGKVIKNNY | TMDIKKINDG | LLDSKILGAF | 50 |
| gi 350998842 gb AEQ38133.1  | MMADSKLVSL | NNNLSGKIKD | QGKVIKNNY | TMDIKKINDG | LLDSKILGAF | 50 |
| gi 350998851 gb AEQ38141.1  | MMADSKLVSL | NNNLSGKIKD | QGKVIKNNY | TMDIKKINDG | LLDSKILGAF | 50 |
| gi 29468607 ref NP_047112.2 | MMADSKLVSL | NNNLSGKIKD | QGKVIKNNY | TMDIKKINDG | LLDSKILGAF | 50 |
| gi 328495182 gb AEB21206.1  | MMADSKLVSL | NNNLSGKIKD | QGKVIKNNY | TMDIKKINDG | LLDSKILGAF | 50 |
| gi 328495203 gb AEB21225.1  | MMADSKLVSL | NNNLSGKIKD | QGKVIKNNY | TMDIKKINDG | LLDSKILGAF | 50 |
| gi 350998831 gb AEQ38124.1  | MMADSKLVSL | NNNLSGKIKD | QGKVIKNNY | TMDIKKINDG | LLDSKILGAF | 50 |
| gi 350998718 gb AEQ38026.1  | MMADSKLVSL | NNNLSGKIKD | QGKVIKNNY | TMDIKKINDG | LLDSKILGAF | 50 |
| gi 350998728 gb AEQ38035.1  | MMADSKLVSL | NNNLSGKIKD | QGKVIKNNY | TMDIKKINDG | LLDSKILGAF | 50 |
| gi 350998737 gb AEQ38043.1  | MMADSKLVSL | NNNLSGKIKD | QGKVIKNNY | TMDIKKINDG | LLDSKILGAF | 50 |
| gi 350998747 gb AEQ38052.1  | MMADSKLVSL | NNNLSGKIKD | QGKVIKNNY | TMDIKKINDG | LLDSKILGAF | 50 |
| gi 350998803 gb AEQ38099.1  | MMADSKLVSL | NNNLSGKIKD | QGKVIKNNY | TMDIKKINDG | LLDSKILGAF | 50 |
| gi 350998821 gb AEQ38115.1  | MMADSKLVSL | NNNLSGKIKD | QGKVIKNNY | TMDIKKINDG | LLDSKILGAF | 50 |
| gi 350998813 gb AEQ38108.1  | MMADSKLVSL | NNNLSGKIKD | QGKVIKNNY | TMDIKKINDG | LLDSKILGAF | 50 |
| gi 328495193 gb AEB21216.1  | MMADSKLVSP | NNNLSGKIKD | QGKVIKNNY | TMDIKKINDG | LLDSKILGAF | 50 |

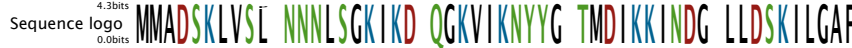

60 80 100

|                             |           |         |            |            |            |     |
|-----------------------------|-----------|---------|------------|------------|------------|-----|
| gi 29432477 gb AAC83193.2   | NTVIALLGS | IIIVMNI | QNYTRTTDNQ | ALIKESLQSV | QQQIKALTDK | 100 |
| gi 328495173 gb AEB21198.1  | NTVIALLGS | IIIVMNI | QNYTRTTDNQ | ALIKESLQSV | QQQIKALTDK | 100 |
| gi 328495213 gb AEB21234.1  | NTVIALLGS | IIIVMNI | QNYTRTTDNQ | ALIKESLQSV | QQQIKALTDK | 100 |
| gi 350998758 gb AEQ38062.1  | NTVIALLGS | IIIVMNI | QNYTRTTDNQ | ALIKESLQSV | QQQIKALTDK | 100 |
| gi 350998768 gb AEQ38071.1  | NTVIALLGS | IIIVMNI | QNYTRTTDNQ | ALIKESLQSV | QQQIKALTDK | 100 |
| gi 350998778 gb AEQ38080.1  | NTVIALLGS | IIIVMNI | QNYTRTTDNQ | ALIKESLQSV | QQQIKALTDK | 100 |
| gi 350998842 gb AEQ38133.1  | NTVIALLGS | IIIVMNI | QNYTRTTDNQ | ALIKESLQSV | QQQIKALTDK | 100 |
| gi 350998851 gb AEQ38141.1  | NTVIALLGS | IIIVMNI | QNYTRTTDNQ | ALIKESLQSV | QQQIKALTDK | 100 |
| gi 29468607 ref NP_047112.2 | NTVIALLGS | IIIVMNI | QNYTRTTDNQ | ALIKESLQSV | QQQIKALTDK | 100 |
| gi 328495182 gb AEB21206.1  | NTVIALLGS | IIIVMNI | QNYTRTTDNQ | ALIKESLQSV | QQQIKALTDK | 100 |
| gi 328495203 gb AEB21225.1  | NTVIALLGS | IIIVMNI | QNYTRTTDNQ | ALIKESLQSV | QQQIKALTDK | 100 |
| gi 350998831 gb AEQ38124.1  | NTVIALLGS | IIIVMNI | QNYTRTTDNQ | ALIKESLQSV | QQQIKALTDK | 100 |
| gi 350998718 gb AEQ38026.1  | NTVIALLGS | IIIVMNI | QNYTRTTDNQ | ALIKESLQSV | QQQIKALTDK | 100 |
| gi 350998728 gb AEQ38035.1  | NTVIALLGS | IIIVMNI | QNYTRTTDNQ | ALIKESLQSV | QQQIKALTDK | 100 |
| gi 350998737 gb AEQ38043.1  | NTVIALLGS | IIIVMNI | QNYTRTTDNQ | ALIKESLQSV | QQQIKALTDK | 100 |
| gi 350998747 gb AEQ38052.1  | NTVIALLGS | IIIVMNI | QNYTRTTDNQ | ALIKESLQSV | QQQIKALTDK | 100 |
| gi 350998803 gb AEQ38099.1  | NTVIALLGS | IIIVMNI | QNYTRTTDNQ | ALIKESLQSV | QQQIKALTDK | 100 |
| gi 350998821 gb AEQ38115.1  | NTVIALLGS | IIIVMNI | QNYTRTTDNQ | ALIKESLQSV | QQQIKALTDK | 100 |
| gi 350998813 gb AEQ38108.1  | NTVIALLGS | IIIVMNI | QNYTRTTDNQ | ALIKESLQSV | QQQIKALTDK | 100 |
| gi 328495193 gb AEB21216.1  | NTVIALLGS | IIIVMNI | QNYTRTTDNQ | ALIKESLQSV | QQQIKALTDK | 100 |

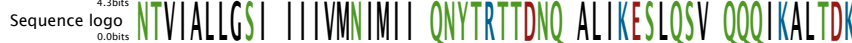

120 140

|                             |            |            |            |            |            |     |
|-----------------------------|------------|------------|------------|------------|------------|-----|
| gi 29432477 gb AAC83193.2   | IGTEIGPKVS | LIDTSSTITI | PANIGLLGSK | ISQSTSSINE | NVNDKCKFTL | 150 |
| gi 328495173 gb AEB21198.1  | IGTEIGPKVS | LIDTSSTITI | PANIGLLGSK | ISQSTSSINE | NVNDKCKFTL | 150 |
| gi 328495213 gb AEB21234.1  | IGTEIGPKVS | LIDTSSTITI | PANIGLLGSK | ISQSTSSINE | NVNDKCKFTL | 150 |
| gi 350998758 gb AEQ38062.1  | IGTEIGPKVS | LIDTSSTITI | PANIGLLGSK | ISQSTSSINE | NVNDKCKFTL | 150 |
| gi 350998768 gb AEQ38071.1  | IGTEIGPKVS | LIDTSSTITI | PANIGLLGSK | ISQSTSSINE | NVNDKCKFTL | 150 |
| gi 350998778 gb AEQ38080.1  | IGTEIGPKVS | LIDTSSTITI | PANIGLLGSK | ISQSTSSINE | NVNDKCKFTL | 150 |
| gi 350998842 gb AEQ38133.1  | IGTEIGPKVS | LIDTSSTITI | PANIGLLGSK | ISQSTSSINE | NVNDKCKFTL | 150 |
| gi 350998851 gb AEQ38141.1  | IGTEIGPKVS | LIDTSSTITI | PANIGLLGSK | ISQSTSSINE | NVNDKCKFTL | 150 |
| gi 29468607 ref NP_047112.2 | IGTEIGPKVS | LIDTSSTITI | PANIGLLGSK | ISQSTSSINE | NVNDKCKFTL | 150 |
| gi 328495182 gb AEB21206.1  | IGTEIGPKVS | LIDTSSTITI | PANIGLLGSK | ISQSTSSINE | NVNDKCKFTL | 150 |
| gi 328495203 gb AEB21225.1  | IGTEIGPKVS | LIDTSSTITI | PANIGLLGSK | ISQSTSSINE | NVNDKCKFTL | 150 |
| gi 350998831 gb AEQ38124.1  | IGTEIGPKVS | LIDTSSTITI | PANIGLLGSK | ISQSTSSINE | NVNDKCKFTL | 150 |
| gi 350998718 gb AEQ38026.1  | IGTEIGPKVS | LIDTSSTITI | PANIGLLGSK | ISQSTSSINE | NVNDKCKFTL | 150 |
| gi 350998728 gb AEQ38035.1  | IGTEIGPKVS | LIDTSSTITI | PANIGLLGSK | ISQSTSSINE | NVNDKCKFTL | 150 |
| gi 350998737 gb AEQ38043.1  | IGTEIGPKVS | LIDTSSTITI | PANIGLLGSK | ISQSTSSINE | NVNDKCKFTL | 150 |
| gi 350998747 gb AEQ38052.1  | IGTEIGPKVS | LIDTSSTITI | PANIGLLGSK | ISQSTSSINE | NVNDKCKFTL | 150 |
| gi 350998803 gb AEQ38099.1  | IGTEIGPKVS | LIDTSSTITI | PANIGLLGSK | ISQSTSSINE | NVNDKCKFTL | 150 |
| gi 350998821 gb AEQ38115.1  | IGTEIGPKVS | LIDTSSTITI | PANIGLLGSK | ISQSTSSINE | NVNDKCKFTL | 150 |
| gi 350998813 gb AEQ38108.1  | IGTEIGPKVS | LIDTSSTITI | PANIGLLGSK | ISQSTSSINE | NVNDKCKFTL | 150 |
| gi 328495193 gb AEB21216.1  | IGTEIGPKVS | LIDTSSTITI | PANIGLLGSK | ISQSTSSINE | NVNDKCKFTL | 150 |

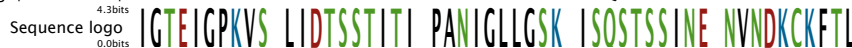

|                              |            |            |             |            |            |
|------------------------------|------------|------------|-------------|------------|------------|
|                              | 160        |            | 180         |            | 200        |
| gij 29432477 gb AAC83193.2   | PPLKIHECNI | SCPNPLPFRE | YRPI SQGVSD | LVGLPNQICL | QKTTSTILKP |
| gij 328495173 gb AEB21198.1  | PPLKIHECNI | SCPNPLPFRE | YRPI SQGVSD | LVGLPNQICL | QKTTSTILKP |
| gij 328495213 gb AEB21234.1  | PPLKIHECNI | SCPNPLPFRE | YRPI SQGVSD | LVGLPNQICL | QKTTSTILKP |
| gij 350998758 gb AEQ38062.1  | PPLKIHECNI | SCPNPLPFRE | YRPI SQGVSD | LVGLPNQICL | QKTTSTILKP |
| gij 350998768 gb AEQ38071.1  | PPLKIHECNI | SCPNPLPFRE | YRPI SQGVSD | LVGLPNQICL | QKTTSTILKP |
| gij 350998778 gb AEQ38080.1  | PPLKIHECNI | SCPNPLPFRE | YRPI SQGVSD | LVGLPNQICL | QKTTSTILKP |
| gij 350998842 gb AEQ38133.1  | PPLKIHECNI | SCPNPLPFRE | YRPI SQGVSD | LVGLPNQICL | QKTTSTILKP |
| gij 350998851 gb AEQ38141.1  | PPLKIHECNI | SCPNPLPFRE | YRPI SQGVSD | LVGLPNQICL | QKTTSTILKP |
| gij 29468607 ref NP_047112.2 | PPLKIHECNI | SCPNPLPFRE | YRPI SQGVSD | LVGLPNQICL | QKTTSTILKP |
| gij 328495182 gb AEB21206.1  | PPLKIHECNI | SCPNPLPFRE | YRPI SQGVSD | LVGLPNQICL | QKTTSTILKP |
| gij 328495203 gb AEB21225.1  | PPLKIHECNI | SCPNPLPFRE | YRPI SQGVSD | LVGLPNQICL | QKTTSTILKP |
| gij 350998831 gb AEQ38124.1  | PPLKIHECNI | SCPNPLPFRE | YRPI SQGVSD | LVGLPNQICL | QKTTSTILKP |
| gij 350998718 gb AEQ38026.1  | PPLKIHECNI | SCPNPLPFRE | YRPI SQGVSD | LVGLPNQICL | QKTTSTILKP |
| gij 350998728 gb AEQ38035.1  | PPLKIHECNI | SCPNPLPFRE | YRPI SQGVSD | LVGLPNQICL | QKTTSTILKP |
| gij 350998737 gb AEQ38043.1  | PPLKIHECNI | SCPNPLPFRE | YRPI SQGVSD | LVGLPNQICL | QKTTSTILKP |
| gij 350998747 gb AEQ38052.1  | PPLKIHECNI | SCPNPLPFRE | YRPI SQGVSD | LVGLPNQICL | QKTTSTILKP |
| gij 350998803 gb AEQ38099.1  | PPLKIHECNI | SCPNPLPFRE | YRPI SQGVSD | LVGLPNQICL | QKTTSTILKP |
| gij 350998821 gb AEQ38115.1  | PPLKIHECNI | SCPNPLPFRE | YRPI SQGVSD | LVGLPNQICL | QKTTSTILKP |
| gij 350998813 gb AEQ38108.1  | PPLKIHECNI | SCPNPLPFRE | YRPI SQGVSD | LVGLPNQICL | QKTTSTILKP |
| gij 328495193 gb AEB21216.1  | PPLKIHECNI | SCPNPLPFRE | YRPI SQGVSD | LVGLPNQICL | QKTTSTILKP |

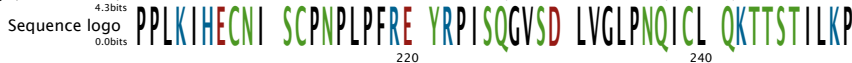

|                              |            |            |            |            |            |
|------------------------------|------------|------------|------------|------------|------------|
|                              | 220        |            | 240        |            |            |
| gij 29432477 gb AAC83193.2   | RLISYTLPIN | TREGVCITDP | LLAVDNGFFA | YSHLEKIGSC | TRGIAKQRII |
| gij 328495173 gb AEB21198.1  | RLISYTLPIN | TREGVCITDP | LLAVDNGFFA | YSHLEKIGSC | TRGIAKQRII |
| gij 328495213 gb AEB21234.1  | RLISYTLPIN | TREGVCITDP | LLAVDNGFFA | YSHLEKIGSC | TRGIAKQRII |
| gij 350998758 gb AEQ38062.1  | RLISYTLPIN | TREGVCITDP | LLAVDNGFFA | YSHLEKIGSC | TRGIAKQRII |
| gij 350998768 gb AEQ38071.1  | RLISYTLPIN | TREGVCITDP | LLAVDNGFFA | YSHLEKIGSC | TRGIAKQRII |
| gij 350998778 gb AEQ38080.1  | RLISYTLPIN | TREGVCITDP | LLAVDNGFFA | YSHLEKIGSC | TRGIAKQRII |
| gij 350998842 gb AEQ38133.1  | RLISYTLPIN | TREGVCITDP | LLAVDNGFFA | YSHLEKIGSC | TRGIAKQRII |
| gij 350998851 gb AEQ38141.1  | RLISYTLPIN | TREGVCITDP | LLAVDNGFFA | YSHLEKIGSC | TRGIAKQRII |
| gij 29468607 ref NP_047112.2 | RLISYTLPIN | TREGVCITDP | LLAVDNGFFA | YSHLEKIGSC | TRGIAKQRII |
| gij 328495182 gb AEB21206.1  | RLISYTLPIN | TREGVCITDP | LLAVDNGFFA | YSHLEKIGSC | TRGIAKQRII |
| gij 328495203 gb AEB21225.1  | RLISYTLPIN | TREGVCITDP | LLAVDNGFFA | YSHLEKIGSC | TRGIAKQRII |
| gij 350998831 gb AEQ38124.1  | RLISYTLPIN | TREGVCITDP | LLAVDNGFFA | YSHLEKIGSC | TRGIAKQRII |
| gij 350998718 gb AEQ38026.1  | RLISYTLPIN | TREGVCITDP | LLAVDNGFFA | YSHLEKIGSC | TRGIAKQRII |
| gij 350998728 gb AEQ38035.1  | RLISYTLPIN | TREGVCITDP | LLAVDNGFFA | YSHLEKIGSC | TRGIAKQRII |
| gij 350998737 gb AEQ38043.1  | RLISYTLPIN | TREGVCITDP | LLAVDNGFFA | YSHLEKIGSC | TRGIAKQRII |
| gij 350998747 gb AEQ38052.1  | RLISYTLPIN | TREGVCITDP | LLAVDNGFFA | YSHLEKIGSC | TRGIAKQRII |
| gij 350998803 gb AEQ38099.1  | RLISYTLPIN | TREGVCITDP | LLAVDNGFFA | YSHLEKIGSC | TRGIAKQRII |
| gij 350998821 gb AEQ38115.1  | RLISYTLPIN | TREGVCITDP | LLAVDNGFFA | YSHLEKIGSC | TRGIAKQRII |
| gij 350998813 gb AEQ38108.1  | RLISYTLPIN | TREGVCITDP | LLAVDNGFFA | YSHLEKIGSC | TRGIAKQRII |
| gij 328495193 gb AEB21216.1  | RLISYTLPIN | TREGVCITDP | LLAVDNGFFA | YSHLEKIGSC | TRGIAKQRII |

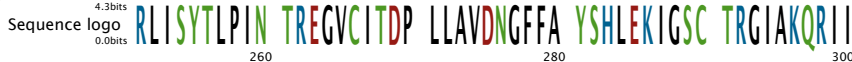

|                              |            |            |            |            |            |
|------------------------------|------------|------------|------------|------------|------------|
|                              | 260        |            | 280        |            | 300        |
| gij 29432477 gb AAC83193.2   | GVGEVLDGRD | KVPSMFMTNV | WTPPNPSTIH | HCSSTYHEDF | YYTLCAVSHV |
| gij 328495173 gb AEB21198.1  | GVGEVLDGRD | KVPSMFMTNV | WTPPNPSTIH | HCSSTYHEDF | YYTLCAVSHV |
| gij 328495213 gb AEB21234.1  | GVGEVLDGRD | KVPSMFMTNV | WTPPNPSTIH | HCSSTYHEDF | YYTLCAVSHV |
| gij 350998758 gb AEQ38062.1  | GVGEVLDGRD | KVPSMFMTNV | WTPPNPSTIH | HCSSTYHEDF | YYTLCAVSHV |
| gij 350998768 gb AEQ38071.1  | GVGEVLDGRD | KVPSMFMTNV | WTPPNPSTIH | HCSSTYHEDF | YYTLCAVSHV |
| gij 350998778 gb AEQ38080.1  | GVGEVLDGRD | KVPSMFMTNV | WTPPNPSTIH | HCSSTYHEDF | YYTLCAVSHV |
| gij 350998842 gb AEQ38133.1  | GVGEVLDGRD | KVPSMFMTNV | WTPPNPSTIH | HCSSTYHEDF | YYTLCAVSHV |
| gij 350998851 gb AEQ38141.1  | GVGEVLDGRD | KVPSMFMTNV | WTPPNPSTIH | HCSSTYHEDF | YYTLCAVSHV |
| gij 29468607 ref NP_047112.2 | GVGEVLDGRD | KVPSMFMTNV | WTPPNPSTIH | HCSSTYHEDF | YYTLCAVSHV |
| gij 328495182 gb AEB21206.1  | GVGEVLDGRD | KVPSMFMTNV | WTPPNPSTIH | HCSSTYHEDF | YYTLCAVSHV |
| gij 328495203 gb AEB21225.1  | GVGEVLDGRD | KVPSMFMTNV | WTPPNPSTIH | HCSSTYHEDF | YYTLCAVSHV |
| gij 350998831 gb AEQ38124.1  | GVGEVLDGRD | KVPSMFMTNV | WTPPNPSTIH | HCSSTYHEDF | YYTLCAVSHV |
| gij 350998718 gb AEQ38026.1  | GVGEVLDGRD | KVPSMFMTNV | WTPPNPSTIH | HCSSTYHEDF | YYTLCAVSHV |
| gij 350998728 gb AEQ38035.1  | GVGEVLDGRD | KVPSMFMTNV | WTPPNPSTIH | HCSSTYHEDF | YYTLCAVSHV |
| gij 350998737 gb AEQ38043.1  | GVGEVLDGRD | KVPSMFMTNV | WTPPNPSTIH | HCSSTYHEDF | YYTLCAVSHV |
| gij 350998747 gb AEQ38052.1  | GVGEVLDGRD | KVPSMFMTNV | WTPPNPSTIH | HCSSTYHEDF | YYTLCAVSHV |
| gij 350998803 gb AEQ38099.1  | GVGEVLDGRD | KVPSMFMTNV | WTPPNPSTIH | HCSSTYHEDF | YYTLCAVSHV |
| gij 350998821 gb AEQ38115.1  | GVGEVLDGRD | KVPSMFMTNV | WTPPNPSTIH | HCSSTYHEDF | YYTLCAVSHV |
| gij 350998813 gb AEQ38108.1  | GVGEVLDGRD | KVPSMFMTNV | WTPPNPSTIH | HCSSTYHEDF | YYTLCAVSHV |
| gij 328495193 gb AEB21216.1  | GVGEVLDGRD | KVPSMFMTNV | WTPPNPSTIH | HCSSTYHEDF | YYTLCAVSHV |

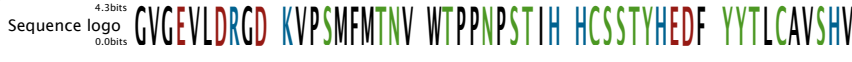

gj|29432477|gb|AAC83193.2| GDPILNSTSW TESLSLIRLA VRPKSDSGDY NQKYIAITKV ERGKYDKVMP 350  
 gj|328495173|gb|AEB21198.1| GDPILNSTSW TESLSLIRLA VRPKSDSGDY NQKYIAITKV ERGKYDKVMP 350  
 gj|328495213|gb|AEB21234.1| GDPILNSTSW TESLSLIRLA VRPKSDSGDY NQKYIAITKV ERGKYDKVMP 350  
 gj|350998758|gb|AEQ38062.1| GDPILNSTSW TESLSLIRLA VRPKSDSGDY NQKYIAITKV ERGKYDKVMP 350  
 gj|350998768|gb|AEQ38071.1| GDPILNSTSW TESLSLIRLA VRPKSDSGDY NQKYIAITKV ERGKYDKVMP 350  
 gj|350998778|gb|AEQ38080.1| GDPILNSTSW TESLSLIRLA VRPKSDSGDY NQKYIAITKV ERGKYDKVMP 350  
 gj|350998842|gb|AEQ38133.1| GDPILNSTSW TESLSLIRLA VRPKSDSGDY NQKYIAITKV ERGKYDKVMP 350  
 gj|350998851|gb|AEQ38141.1| GDPILNSTSW TESLSLIRLA VRPKSDSGDY NQKYIAITKV ERGKYDKVMP 350  
 gj|29468607|ref|NP\_047112.2| GDPILNSTSW TESLSLIRLA VRPKSDSGDY NQKYIAITKV ERGKYDKVMP 350  
 gj|328495182|gb|AEB21206.1| GDPILNSTSW TESLSLIRLA VRPKSDSGNY NQKYIAITKV ERGKYDKVMP 350  
 gj|328495203|gb|AEB21225.1| GDPILNSTSW TESLSLIRLA VRPKSDSGDY NQKYIAITKV ERGKYDKVMP 350  
 gj|350998831|gb|AEQ38124.1| GDPILNSTSW TESLSLIRLA VRPKSDSGDY NQKYIAITKV ERGKYDKVMP 350  
 gj|350998718|gb|AEQ38026.1| GDPILNSTSW TESLSLIRLA VRPKSDSGDY NQKYITITKV ERGKYDKVMP 350  
 gj|350998728|gb|AEQ38035.1| GDPILNSTSW TESLSLIRLA VRPKSDSGDY NQKYITITKV ERGKYDKVMP 350  
 gj|350998737|gb|AEQ38043.1| GDPILNSTSW TESLSLIRLA VRPKSDSGDY NQKYITITKV ERGKYDKVMP 350  
 gj|350998747|gb|AEQ38052.1| GDPILNSTSW TESLSLIRLA VRPKSDSGDY NQKYITITKV ERGKYDKVMP 350  
 gj|350998803|gb|AEQ38099.1| GDPILNSTSW TESLSLIRLA VRPKSDSGDY NQKYITITKV ERGKYDKVMP 350  
 gj|350998821|gb|AEQ38115.1| GDPILNSTSW TESLSLIRLA VRPKSDNGDY NQKYIAITKV ERGKYDKVMP 350  
 gj|350998813|gb|AEQ38108.1| GDPILNSTSW TESLSLIRLA VRPKSDSGDY NQKYITITKV ERGKYDKVMP 350  
 gj|328495193|gb|AEB21216.1| GDPILNSTSW TESLSLIRLA VRPKSDSGDY NQKYIAINKV ERGKYDKVMP 350

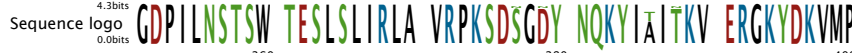

gj|29432477|gb|AAC83193.2| YGPGSIKQGD TLYFFAVGFL PRTEFQYND S NCP I IHCKYS KAENCR L SMG 400  
 gj|328495173|gb|AEB21198.1| YGPGSIKQGD TLYFFAVGFL PRTEFQYND S NCP I IHCKYS KAENCR L SMG 400  
 gj|328495213|gb|AEB21234.1| YGPGSIKQGD TLYFFAVGFL PRTEFQYND S NCP I IHCKYS KAENCR L SMG 400  
 gj|350998758|gb|AEQ38062.1| YGPGSIKQGD TLYFFAVGFL PRTEFQYND S NCP I IHCKYS KAENCR L SMG 400  
 gj|350998768|gb|AEQ38071.1| YGPGSIKQGD TLYFFAVGFL PRTEFQYND S NCP I IHCKYS KAENCR L SMG 400  
 gj|350998778|gb|AEQ38080.1| YGPGSIKQGD TLYFFAVGFL PRTEFQYND S NCP I IHCKYS KAENCR L SMG 400  
 gj|350998842|gb|AEQ38133.1| YGPGSIKQGD TLYFFAVGFL PRTEFQYND S NCP I IHCKYS KAENCR L SMG 400  
 gj|350998851|gb|AEQ38141.1| YGPGSIKQGD TLYFFAVGFL PRTEFQYND S NCP I IHCKYS KAENCR L SMG 400  
 gj|29468607|ref|NP\_047112.2| YGPGSIKQGD TLYFFAVGFL PRTEFQYND S NCP I IHCKYS KAENCR L SMG 400  
 gj|328495182|gb|AEB21206.1| YGPGSIKQGD TLYFFAVGFL PRTEFQYND S NCP I IHCKYS KAENCR L SMG 400  
 gj|328495203|gb|AEB21225.1| YGPGSIKQGD TLYFFAVGFL PRTEFQYND S NCP I IHCKYS KAENCR L SMG 400  
 gj|350998831|gb|AEQ38124.1| YGPGSIKQGD TLYFFAVGFL PRTEFQYND S NCP I IHCKYS KAENCR L SMG 400  
 gj|350998718|gb|AEQ38026.1| YGPGSIKQGD TLYFFAVGFL PRTEFQYND S NCP I IHCKYS KAENCR L SMG 400  
 gj|350998728|gb|AEQ38035.1| YGPGSIKQGD TLYFFAVGFL PRTEFQYND S NCP I IHCKYS KAENCR L SMG 400  
 gj|350998737|gb|AEQ38043.1| YGPGSIKQGD TLYFFAVGFL PRTEFQYND S NCP I IHCKYS KAENCR L SMG 400  
 gj|350998747|gb|AEQ38052.1| YGPGSIKQGD TLYFFAVGFL PRTEFQYND S NCP I IHCKYS KAENCR L SMG 400  
 gj|350998803|gb|AEQ38099.1| YGPGSIKQGD TLYFFAVGFL PRTEFQYND S NCP I IHCKYS KAENCR L SMG 400  
 gj|350998821|gb|AEQ38115.1| YGPGSIKQGD TLYFFAVGFL PRTEFQYND S NCP I IHCKYS KAENCR L SMG 400  
 gj|350998813|gb|AEQ38108.1| YGPGSIKQGD TLYFFAVGFL PRTEFQYND S NCP I IHCKYS KAENCR L SMG 400  
 gj|328495193|gb|AEB21216.1| YGPGSIKQGD TLYFFAVGFL PRTEFQYND S NCP I IHCKYS KAENCR L SMG 400

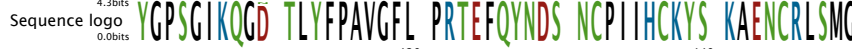

gj|29432477|gb|AAC83193.2| VNSKSHYILR SGLLKYNL S L GGD I I LQF I E IADNRLTIG S PSKIYNSLGQ 450  
 gj|328495173|gb|AEB21198.1| VNSKSHYILR SGLLKYNL S L GGD I I LQF I E IADNRLTIG S PSKIYNSLGQ 450  
 gj|328495213|gb|AEB21234.1| VNSKSHYILR SGLLKYNL S L GGD I I LQF I E IADNRLTIG S PSKIYNSLGQ 450  
 gj|350998758|gb|AEQ38062.1| VNSKSHYILR SGLLKYNL S L GGD I I LQF I E IADNRLTIG S PSKIYNSLGQ 450  
 gj|350998768|gb|AEQ38071.1| VNSKSHYILR SGLLKYNL S L GGD I I LQF I E IADNRLTIG S PSKIYNSLGQ 450  
 gj|350998778|gb|AEQ38080.1| VNSKSHYILR SGLLKYNL S L GGD I I LQF I E IADNRLTIG S PSKIYNSLGQ 450  
 gj|350998842|gb|AEQ38133.1| VNSKSHYILR SGLLKYNL S L GGD I I LQF I E IADNRLTIG S PSKIYNSLGQ 450  
 gj|350998851|gb|AEQ38141.1| VNSKSHYILR SGLLKYNL S L GGD I I LQF I E IADNRLTIG S PSKIYNSLGQ 450  
 gj|29468607|ref|NP\_047112.2| VNSKSHYILR SGLLKYNL S L GGD I I LQF I E IADNRLTIG S PSKIYNSLGQ 450  
 gj|328495182|gb|AEB21206.1| VNSKSHYILR SGLLKYNL S L GGD I I LQF I E IADNRLTIG S PSKIYNSLGQ 450  
 gj|328495203|gb|AEB21225.1| VNSKSHYILR SGLLKYNL S L GGD I I LQF I E IADNRLTIG S PSKIYNSLGQ 450  
 gj|350998831|gb|AEQ38124.1| VNSKSHYILR SGLLKYNL S L GGD I I LQF I E IADNRLTIG S PSKIYNSLGQ 450  
 gj|350998718|gb|AEQ38026.1| VNSKSHYILR SGLLKYNL S L GGD I I LQF I E IADNRLTIG S PSKIYNSLGQ 450  
 gj|350998728|gb|AEQ38035.1| VNSKSHYILR SGLLKYNL S L GGD I I LQF I E IADNRLTIG S PSKIYNSLGQ 450  
 gj|350998737|gb|AEQ38043.1| VNSKSHYILR SGLLKYNL S L GGD I I LQF I E IADNRLTIG S PSKIYNSLGQ 450  
 gj|350998747|gb|AEQ38052.1| VNSKSHYILR SGLLKYNL S L GGD I I LQF I E IADNRLTIG S PSKIYNSLGQ 450  
 gj|350998803|gb|AEQ38099.1| VNSKSHYILR SGLLKYNL S L GGD I I LQF I E IADNRLTIG S PSKIYNSLGQ 450  
 gj|350998821|gb|AEQ38115.1| VNSKSHYILR SGLLKYNL S L GGD I I LQF I E IADNRLTIG S PSKIYNSLGQ 450  
 gj|350998813|gb|AEQ38108.1| VNSKSHYILR SGLLKYNL S L GGD I I LQF I E IADNRLTIG S PSKIYNSLGQ 450  
 gj|328495193|gb|AEB21216.1| VNSKSHYILR SGLLKYNL S L GGD I I LQF I E IADNRLTIG S PSKIYNSLGQ 450

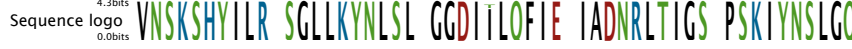

|                             |             |            |            |            |            |     |
|-----------------------------|-------------|------------|------------|------------|------------|-----|
|                             | 460         | 480        | 500        |            |            |     |
| gi 29432477 gb AAC83193.2   | PVIFYQASYSW | DTMIKLGVDV | TVDPLRVQWR | NNSVISRPGQ | SQCPRFNVCP | 500 |
| gi 328495173 gb AEB21198.1  | PVIFYQASYSW | DTMIKLGVDV | TVDPLRVQWR | NNSVISRPGQ | SQCPRFNVCP | 500 |
| gi 328495213 gb AEB21234.1  | PVIFYQASYSW | DTMIKLGVDV | TVDPLRVQWR | NNSVISRPGQ | SQCPRFNVCP | 500 |
| gi 350998758 gb AEQ38062.1  | PVIFYQASYSW | DTMIKLGVDV | TVDPLRVQWR | NNSVISRPGQ | SQCPRFNVCP | 500 |
| gi 350998768 gb AEQ38071.1  | PVIFYQASYSW | DTMIKLGVDV | TVDPLRVQWR | NNSVISRPGQ | SQCPRFNVCP | 500 |
| gi 350998778 gb AEQ38080.1  | PVIFYQASYSW | DTMIKLGVDV | TVDPLRVQWR | NNSVISRPGQ | SQCPRFNVCP | 500 |
| gi 350998842 gb AEQ38133.1  | PVIFYQASYSW | DTMIKLGVDV | TVDPLRVQWR | NNSVISRPGQ | SQCPRFNVCP | 500 |
| gi 350998851 gb AEQ38141.1  | PVIFYQASYSW | DTMIKLGVDV | TVDPLRVQWR | NNSVISRPGQ | SQCPRFNVCP | 500 |
| gi 29468607 ref NP_047112.2 | PVIFYQASYSW | DTMIKLGVDV | TVDPLRVQWR | NNSVISRPGQ | SQCPRFNVCP | 500 |
| gi 328495182 gb AEB21206.1  | PVIFYQASYSW | DTMIKLGVDV | TVDPLRVQWR | NNSVISRPGQ | SQCPRFNVCP | 500 |
| gi 328495203 gb AEB21225.1  | PVIFYQASYSW | DTMIKLGVDV | TVDPLRVQWR | NNSVISRPGQ | SQCPRFNVCP | 500 |
| gi 350998831 gb AEQ38124.1  | PVIFYQASYSW | DTMIKLGVDV | TVDPLRVQWR | NNSVISRPGQ | SQCPRFNVCP | 500 |
| gi 350998718 gb AEQ38026.1  | PVIFYQASYSW | DTMIKLGVDV | TVDPLRVQWR | NNSVISRPGQ | SQCPRFNVCP | 500 |
| gi 350998728 gb AEQ38035.1  | PVIFYQASYSW | DTMIKLGVDV | TVDPLRVQWR | NNSVISRPGQ | SQCPRFNVCP | 500 |
| gi 350998737 gb AEQ38043.1  | PVIFYQASYSW | DTMIKLGVDV | TVDPLRVQWR | NNSVISRPGQ | SQCPRFNVCP | 500 |
| gi 350998747 gb AEQ38052.1  | PVIFYQASYSW | DTMIKLGVDV | TVDPLRVQWR | NNSVISRPGQ | SQCPRFNVCP | 500 |
| gi 350998803 gb AEQ38099.1  | PVIFYQASYSW | DTMIKLGVDV | TVDPLRVQWR | NNSVISRPGQ | SQCPRFNVCP | 500 |
| gi 350998821 gb AEQ38115.1  | PVIFYQASYSW | DTMIKLGVDV | TVDPLRVQWR | NNSVISRPGQ | SQCPRFNVCP | 500 |
| gi 350998813 gb AEQ38108.1  | PVIFYQASYSW | DTMIKLGVDV | TVDPLRVQWR | NNSVISRPGQ | SQCPRFNVCP | 500 |
| gi 328495193 gb AEB21216.1  | PVIFYQASYSW | DTMIKLGVDV | TVDPLRVQWR | NNSVISRPGQ | SQCPRFNVCP | 500 |

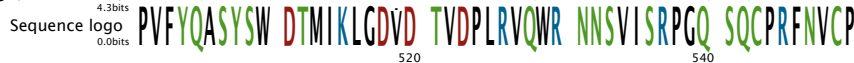

|                             |            |            |           |            |            |     |
|-----------------------------|------------|------------|-----------|------------|------------|-----|
| gi 29432477 gb AAC83193.2   | EVCWEGTYND | AFLIDRLNWW | SAGVYLSNQ | TAENPVFAVF | KDNEILYQVP | 550 |
| gi 328495173 gb AEB21198.1  | EVCWEGTYND | AFLIDRLNWW | SAGVYLSNQ | TAENPVFAVF | KDNEILYQVP | 550 |
| gi 328495213 gb AEB21234.1  | EVCWEGTYND | AFLIDRLNWW | SAGVYLSNQ | TAENPVFAVF | KDNEILYQVP | 550 |
| gi 350998758 gb AEQ38062.1  | EVCWEGTYND | AFLIDRLNWW | SAGVYLSNQ | TAENPVFAVF | KDNEILYQVP | 550 |
| gi 350998768 gb AEQ38071.1  | EVCWEGTYND | AFLIDRLNWW | SAGVYLSNQ | TAENPVFAVF | KDNEILYQVP | 550 |
| gi 350998778 gb AEQ38080.1  | EVCWEGTYND | AFLIDRLNWW | SAGVYLSNQ | TAENPVFAVF | KDNEILYQVP | 550 |
| gi 350998842 gb AEQ38133.1  | EVCWEGTYND | AFLIDRLNWW | SAGVYLSNQ | TAENPVFAVF | KDNEILYQVP | 550 |
| gi 350998851 gb AEQ38141.1  | EVCWEGTYND | AFLIDRLNWW | SAGVYLSNQ | TAENPVFAVF | KDNEILYQVP | 550 |
| gi 29468607 ref NP_047112.2 | EVCWEGTYND | AFLIDRLNWW | SAGVYLSNQ | TAENPVFAVF | KDNEILYQVP | 550 |
| gi 328495182 gb AEB21206.1  | EVCWEGTYND | AFLIDRLNWW | SAGVYLSNQ | TAENPVFAVF | KDNEILYQVP | 550 |
| gi 328495203 gb AEB21225.1  | EVCWEGTYND | AFLIDRLNWW | SAGVYLSNQ | TAENPVFAVF | KDNEILYQVP | 550 |
| gi 350998831 gb AEQ38124.1  | EVCWEGTYND | AFLIDRLNWW | SAGVYLSNQ | TAENPVFAVF | KDNEILYQVP | 550 |
| gi 350998718 gb AEQ38026.1  | EVCWEGTYND | AFLIDRLNWW | SAGVYLSNQ | TAENPVFAVF | KDNEILYQVP | 550 |
| gi 350998728 gb AEQ38035.1  | EVCWEGTYND | AFLIDRLNWW | SAGVYLSNQ | TAENPVFAVF | KDNEILYQVP | 550 |
| gi 350998737 gb AEQ38043.1  | EVCWEGTYND | AFLIDRLNWW | SAGVYLSNQ | TAENPVFAVF | KDNEILYQVP | 550 |
| gi 350998747 gb AEQ38052.1  | EVCWEGTYND | AFLIDRLNWW | SAGVYLSNQ | TAENPVFAVF | KDNEILYQVP | 550 |
| gi 350998803 gb AEQ38099.1  | EVCWEGTYND | AFLIDRLNWW | SAGVYLSNQ | TAENPVFAVF | KDNEILYQVP | 550 |
| gi 350998821 gb AEQ38115.1  | EVCWEGTYND | AFLIDRLNWW | SAGVYLSNQ | TAENPVFAVF | KDNEILYQVP | 550 |
| gi 350998813 gb AEQ38108.1  | EVCWEGTYND | AFLIDRLNWW | SAGVYLSNQ | TAENPVFAVF | KDNEILYQVP | 550 |
| gi 328495193 gb AEB21216.1  | EVCWEGTYND | AFLIDRLNWW | SAGVYLSNQ | TAENPVFAVF | KDNEILYQVP | 550 |

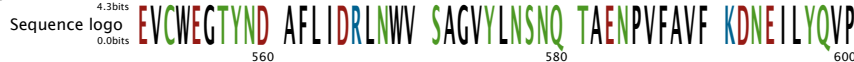

|                             |            |           |            |            |            |     |
|-----------------------------|------------|-----------|------------|------------|------------|-----|
| gi 29432477 gb AAC83193.2   | LAEDDTNAQK | TITDCFLEN | VIWCISLVEI | YDTGDSVIRP | KLFAVKIPAQ | 600 |
| gi 328495173 gb AEB21198.1  | LAEDDTNAQK | TITDCFLEN | VIWCISLVEI | YDTGDSVIRP | KLFAVKIPAQ | 600 |
| gi 328495213 gb AEB21234.1  | LAEDDTNAQK | TITDCFLEN | VIWCISLVEI | YDTGDSVIRP | KLFAVKIPAQ | 600 |
| gi 350998758 gb AEQ38062.1  | LAEDDTNAQK | TITDCFLEN | VIWCISLVEI | YDTGDSVIRP | KLFAVKIPAQ | 600 |
| gi 350998768 gb AEQ38071.1  | LAEDDTNAQK | TITDCFLEN | VIWCISLVEI | YDTGDSVIRP | KLFAVKIPAQ | 600 |
| gi 350998778 gb AEQ38080.1  | LAEDDTNAQK | TITDCFLEN | VIWCISLVEI | YDTGDSVIRP | KLFAVKIPAQ | 600 |
| gi 350998842 gb AEQ38133.1  | LAEDDTNAQK | TITDCFLEN | VIWCISLVEI | YDTGDSVIRP | KLFAVKIPAQ | 600 |
| gi 350998851 gb AEQ38141.1  | LAEDDTNAQK | TITDCFLEN | VIWCISLVEI | YDTGDSVIRP | KLFAVKIPAQ | 600 |
| gi 29468607 ref NP_047112.2 | LAEDDTNAQK | TITDCFLEN | VIWCISLVEI | YDTGDSVIRP | KLFAVKIPAQ | 600 |
| gi 328495182 gb AEB21206.1  | LAEDDTNAQK | TITDCFLEN | VIWCISLVEI | YDTGDSVIRP | KLFAVKIPAQ | 600 |
| gi 328495203 gb AEB21225.1  | LAEDDTNAQK | TITDCFLEN | VIWCISLVEI | YDTGDSVIRP | KLFAVKIPAQ | 600 |
| gi 350998831 gb AEQ38124.1  | LAEDDTNAQK | TITDCFLEN | VIWCISLVEI | YDTGDSVIRP | KLFAVKIPAQ | 600 |
| gi 350998718 gb AEQ38026.1  | LAEDDTNAQK | TITDCFLEN | VIWCISLVEI | YDTGDSVIRP | KLFAVKIPAQ | 600 |
| gi 350998728 gb AEQ38035.1  | LAEDDTNAQK | TITDCFLEN | VIWCISLVEI | YDTGDSVIRP | KLFAVKIPAQ | 600 |
| gi 350998737 gb AEQ38043.1  | LAEDDTNAQK | TITDCFLEN | VIWCISLVEI | YDTGDSVIRP | KLFAVKIPAQ | 600 |
| gi 350998747 gb AEQ38052.1  | LAEDDTNAQK | TITDCFLEN | VIWCISLVEI | YDTGDSVIRP | KLFAVKIPAQ | 600 |
| gi 350998803 gb AEQ38099.1  | LAEDDTNAQK | TITDCFLEN | VIWCISLVEI | YDTGDSVIRP | KLFAVKIPAQ | 600 |
| gi 350998821 gb AEQ38115.1  | LAEDDTNAQK | TITDCFLEN | VIWCISLVEI | YDTGDSVIRP | KLFAVKIPAQ | 600 |
| gi 350998813 gb AEQ38108.1  | LAEDDTNAQK | TITDCFLEN | VIWCISLVEI | YDTGDSVIRP | KLFAVKIPAQ | 600 |
| gi 328495193 gb AEB21216.1  | LAEDDTNAQK | TITDCFLEN | VIWCISLVEI | YDTGDSVIRP | KLFAVKIPAQ | 600 |

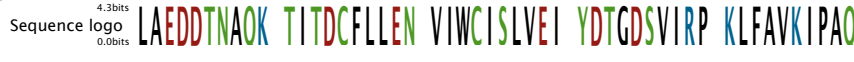

gjl29432477|gb|AAC83193.2| CSES 604  
 gjl328495173|gb|AEB21198.1| CSES 604  
 gjl328495213|gb|AEB21234.1| CSES 604  
 gjl350998758|gb|AEQ38062.1| CSES 604  
 gjl350998768|gb|AEQ38071.1| CSES 604  
 gjl350998778|gb|AEQ38080.1| CSES 604  
 gjl350998842|gb|AEQ38133.1| CSES 604  
 gjl350998851|gb|AEQ38141.1| CSES 604  
 gjl29468607|ref|NP\_047112.2| CSES 604  
 gjl328495182|gb|AEB21206.1| CSES 604  
 gjl328495203|gb|AEB21225.1| CSES 604  
 gjl350998831|gb|AEQ38124.1| CSES 604  
 gjl350998718|gb|AEQ38026.1| CSES 604  
 gjl350998728|gb|AEQ38035.1| CSES 604  
 gjl350998737|gb|AEQ38043.1| CSES 604  
 gjl350998747|gb|AEQ38052.1| CSES 604  
 gjl350998803|gb|AEQ38099.1| CSES 604  
 gjl350998821|gb|AEQ38115.1| CSES 604  
 gjl350998813|gb|AEQ38108.1| CSES 604  
 gjl328495193|gb|AEB21216.1| CSES 604

Sequence logo  
 4.3bits  
 0.0bits 

Supplement: ppat.1003684.s009.pdf [file ppat.1003684.s009.pdf]
