# Supplementary material for: Crystal Structure of the Hendra Virus Attachment G Glycoprotein Bound to a Potent Cross-Reactive Neutralizing Human Monoclonal Antibody
Source: PubMed Central journal article supplement (PMC3795035; doi:10.1371/journal.ppat.1003684), 2013-10-10
Supplement: ppat.1003684.s010.pdf [file ppat.1003684.s010.pdf]

|                             | 20         | 40         |                                     |
|-----------------------------|------------|------------|-------------------------------------|
| gi 13518009 gb AAK29088.1   | MPAENKKVRF | ENTTSDKGKI | PSKVIKSYYG TMDIKKINEG LLDSKILSAF 50 |
| gi 15487369 gb AAK50545.1   | MPAENKKVRF | ENTTSDKGKI | PSKVIKSYYG TMDIKKINEG LLDSKILSAF 50 |
| gi 15487379 gb AAK50554.1   | MPAENKKVRF | ENTTSDKGKI | PSKVIKSYYG TMDIKKINEG LLDSKILSAF 50 |
| gi 20152868 gb AAM13406.1   | MPAENKKVRF | ENTTSDKGKI | PSKVIKSYYG TMDIKKINEG LLDSKILSAF 50 |
| gi 40644703 emb CAD92351.1  | MPAENKKVRF | ENTTSDKGKI | PSKVIKSYYG TMDIKKINEG LLDSKILSAF 50 |
| gi 40644710 emb CAD92357.1  | MPAENKKVRF | ENTTSDKGKI | PSKVIKSYYG TMDIKKINEG LLDSKILSAF 50 |
| gi 40644717 emb CAD92363.1  | MPAENKKVRF | ENTTSDKGKI | PSKVIKSYYG TMDIKKINEG LLDSKILSAF 50 |
| gi 13559814 ref NP_112027.1 | MPAENKKVRF | ENTTSDKGKI | PSKVIKSYYG TMDIKKINEG LLDSKILSAF 50 |
| gi 57282813 emb CAF25497.1  | MPAENKKVRF | ENTTSDKGKN | PSKVIKSYYG TMDIKKINEG LLDSKILSAF 50 |
| gi 307557085 gb ADN51995.1  | MPAENKKVRF | ENTTSDKGKN | PSKVIKSYYG TMDIKKINEG LLDSKILSAF 50 |
| gi 313476293 emb CBM41034.1 | MPAENKKVRF | ENTTSDKGKN | PSKVIKSYYG TMDIKKINEG LLDSKILSAF 50 |
| gi 66271898 gb AAY43916.1   | MPTESKKVRF | ENTASDKGKN | PSKVIKSYYG TMDIKKINEG LLDSKILSAF 50 |
| gi 374256950 gb AEZ01382.1  | MPTESKKVRF | ENTASDKGKN | PSKVIKSYYG TMDIKKINEG LLDSKILSAF 50 |
| gi 374256958 gb AEZ01389.1  | MPTESKKVRF | ENTASDKGKN | PSKVIKSYYG TMDIKKINEG LLDSKILSAF 50 |
| gi 253559848 gb ACT32615.1  | MPTESKKVRF | ENTASDKGKN | PSKVIKSYYG TMDIKKINEG LLDSKILSAF 50 |
| gi 374256967 gb AEZ01397.1  | MPTESKKVRF | ENTASDKGKN | PSKVIKSYYG TMDIKKINEG LLDSKILSAF 50 |
| gi 357640965 gb AET87354.1  | -----      | -----      | -----                               |

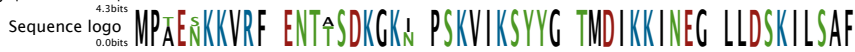

|                             | 60         | 80        | 100        |                           |
|-----------------------------|------------|-----------|------------|---------------------------|
| gi 13518009 gb AAK29088.1   | NTVIALLSGI | VIVMNIIMI | QNYTRSTDNQ | AVIKDALQGI QQQIKGLADK 100 |
| gi 15487369 gb AAK50545.1   | NTVIALLSGI | VIVMNIIMI | QNYTRSTDNQ | AVIKDALQGI QQQIKGLADK 100 |
| gi 15487379 gb AAK50554.1   | NTVIALLSGI | VIVMNIIMI | QNYTRSTDNQ | AVIKDALQGI QQQIKGLADK 100 |
| gi 20152868 gb AAM13406.1   | NTVIALLSGI | VIVMNIIMI | QNYTRSTDNQ | AVIKDALQGI QQQIKGLADK 100 |
| gi 40644703 emb CAD92351.1  | NTVIALLSGI | VIVMNIIMI | QNYTRSTDNQ | AVIKDALQGI QQQIKGLADK 100 |
| gi 40644710 emb CAD92357.1  | NTVIALLSGI | VIVMNIIMI | QNYTRSTDNQ | AVIKDALQGI QQQIKGLADK 100 |
| gi 40644717 emb CAD92363.1  | NTVIALLSGI | VIVMNIIMI | QNYTRSTDNQ | AVIKDALQGI QQQIKGLADK 100 |
| gi 13559814 ref NP_112027.1 | NTVIALLSGI | VIVMNIIMI | QNYTRSTDNQ | AVIKDALQGI QQQIKGLADK 100 |
| gi 57282813 emb CAF25497.1  | NTVIALLSGI | VIVMNIIMI | QNYTRSTDNQ | AVIKDALQGI QQQIKGLADK 100 |
| gi 307557085 gb ADN51995.1  | NTVIALLSGI | VIVMNIIMI | QNYTRSTDNQ | AVIKDALQGI QQQIKGLADK 100 |
| gi 313476293 emb CBM41034.1 | NTVIALLSGI | VIVMNIIMI | QNYTRSTDNQ | AVIKDALQGI QQQIKGLADK 100 |
| gi 66271898 gb AAY43916.1   | NTVIALLSGI | VIVMNIIMI | QNYTRSTDNQ | AMIKDALQSI QQQIKGLADK 100 |
| gi 374256950 gb AEZ01382.1  | NTVIALLSGI | VIVMNIIMI | QNYTRSTDNQ | AMIKDALQSI QQQIKGLADK 100 |
| gi 374256958 gb AEZ01389.1  | NTVIALLSGI | VIVMNIIMI | QNYTRSTDNQ | AMIKDALQSI QQQIKGLADK 100 |
| gi 253559848 gb ACT32615.1  | NTVIALLSGI | VIVMNIIMI | QNYTRSTDNQ | AMIKDALQSI QQQIKGLADK 100 |
| gi 374256967 gb AEZ01397.1  | NTVIALLSGI | VIVMNIIMI | QNYTRSTDNQ | AMIKDALQSI QQQIKGLADK 100 |
| gi 357640965 gb AET87354.1  | -----      | -----     | -----      | -----                     |

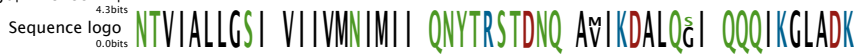

|                             | 120         | 140        |                                      |
|-----------------------------|-------------|------------|--------------------------------------|
| gi 13518009 gb AAK29088.1   | IGTEIGPKVVS | LIDTSSTITI | PANIGLLGSK ISQSTASINE NVNEKCKFTL 150 |
| gi 15487369 gb AAK50545.1   | IGTEIGPKVVS | LIDTSSTITI | PANIGLLGSK ISQSTASINE NVNEKCKFTL 150 |
| gi 15487379 gb AAK50554.1   | IGTEIGPKVVS | LIDTSSTITI | PANIGLLGSK ISQSTASINE NVNEKCKFTL 150 |
| gi 20152868 gb AAM13406.1   | IGTEIGPKVVS | LIDTSSTITI | PANIGLLGSK ISQSTASINE NVNEKCKFTL 150 |
| gi 40644703 emb CAD92351.1  | IGTEIGPKVVS | LIDTSSTITI | PANIGLLGSK ISQSTASINE NVNEKCKFTL 150 |
| gi 40644710 emb CAD92357.1  | IGTEIGPKVVS | LIDTSSTITI | PANIGLLGSK ISQSTASINE NVNEKCKFTL 150 |
| gi 40644717 emb CAD92363.1  | IGTEIGPKVVS | LIDTSSTITI | PANIGLLGSK ISQSTASINE NVNEKCKFTL 150 |
| gi 13559814 ref NP_112027.1 | IGTEIGPKVVS | LIDTSSTITI | PANIGLLGSK ISQSTASINE NVNEKCKFTL 150 |
| gi 57282813 emb CAF25497.1  | IGTEIGPKVVS | LIDTSSTITI | PANIGLLGSK ISQSTASINE NVNEKCKFTL 150 |
| gi 307557085 gb ADN51995.1  | IGTEIGPKVVS | LIDTSSTITI | PANIGLLGSK ISQSTASINE NVNEKCKFTL 150 |
| gi 313476293 emb CBM41034.1 | IGTEIGPKVVS | LIDTSSTITI | PANIGLLGSK ISQSTASINE NVNEKCKFTL 150 |
| gi 66271898 gb AAY43916.1   | IGTEIGPKVVS | LIDTSSTITI | PANIGLLGSK ISQSTASINE NVNEKCKFTL 150 |
| gi 374256950 gb AEZ01382.1  | IGTEIGPKVVS | LIDTSSTITI | PANIGLLGSK ISQSTASINE NVNEKCKFTL 150 |
| gi 374256958 gb AEZ01389.1  | IGTEIGPKVVS | LIDTSSTITI | PANIGLLGSK ISQSTASINE NVNEKCKFTL 150 |
| gi 253559848 gb ACT32615.1  | IGTEIGPKVVS | LIDTSSTITI | PANIGLLGSK ISQSTASINE NVNEKCKFTL 150 |
| gi 374256967 gb AEZ01397.1  | IGTEIGPKVVS | LIDTSSTITI | PANIGLLGSK ISQSTASINE NVNEKCKFTL 150 |
| gi 357640965 gb AET87354.1  | -----       | -----      | -----                                |

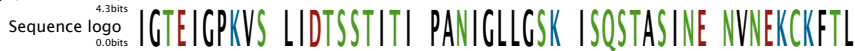

|                             | 160         | 180       | 200        |                           |
|-----------------------------|-------------|-----------|------------|---------------------------|
| gi 13518009 gb AAK29088.1   | PPLKIH ECNI | SCPNLPFRE | YRPQTEGVSN | LVGLPNNICL QKTSNQILKP 200 |
| gi 15487369 gb AAK50545.1   | PPLKIH ECNI | SCPNLPFRE | YRPQTEGVSN | LVGLPNNICL QKTSNQILKP 200 |
| gi 15487379 gb AAK50554.1   | PPLKIH ECNI | SCPNLPFRE | YRPQTEGVSN | LVGLPNNICL QKTSNQILKP 200 |
| gi 20152868 gb AAM13406.1   | PPLKIH ECNI | SCPNLPFRE | YRPQTEGVSN | LVGLPNNICL QKTSNQILKP 200 |
| gi 40644703 emb CAD92351.1  | PPLKIH ECNI | SCPNLPFRE | YRPQTEGVSN | LVGLPNNICL QKTSNQILKP 200 |
| gi 40644710 emb CAD92357.1  | PPLKIH ECNI | SCPNLPFRE | YRPQTEGVSN | LVGLPNNICL QKTSNQILKP 200 |
| gi 40644717 emb CAD92363.1  | PPLKIH ECNI | SCPNLPFRE | YRPQTEGVSN | LVGLPNNICL QKTSNQILKP 200 |
| gi 13559814 ref NP_112027.1 | PPLKIH ECNI | SCPNLPFRE | YRPQTEGVSN | LVGLPNNICL QKTSNQILKP 200 |
| gi 57282813 emb CAF25497.1  | PPLKIH ECNI | SCPNLPFRE | YRPQTEGVSN | LVGLPNNICL QKTSNQILKP 200 |
| gi 307557085 gb ADN51995.1  | PPLKIH ECNI | SCPNLPFRE | YRPQTEGVSN | LVGLPNNICL QKTSNQILKP 200 |
| gi 313476293 emb CBM41034.1 | PPLKIH ECNI | SCPNLPFRE | YRPQTEGVSN | LVGLPNNICL QKTSNQILKP 200 |
| gi 66271898 gb AAY43916.1   | PPLKIH ECNI | SCPNLPFRE | YRPQTEGVSN | LVGLPNNICL QKTSNQILKP 200 |
| gi 374256950 gb AEZ01382.1  | PPLKIH ECNI | SCPNLPFRE | YRPQTEGVSN | LVGLPNNICL QKTSNQILKP 200 |
| gi 374256958 gb AEZ01389.1  | PPLKIH ECNI | SCPNLPFRE | YRPQTEGVSN | LVGLPNNICL QKTSNQILKP 200 |
| gi 253559848 gb ACT32615.1  | PPLKIH ECNI | SCPNLPFRE | YRPQTEGVSN | LVGLPNNICL QKTSNQILKP 200 |
| gi 374256967 gb AEZ01397.1  | PPLKIH ECNI | SCPNLPFRE | YRPQTEGVSN | LVGLPNNICL QKTSNQILKP 200 |
| gi 357640965 gb AET87354.1  | -----       | -----     | -----      | -----                     |

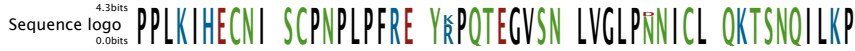

220 240

|                              |             |             |            |            |           |     |
|------------------------------|-------------|-------------|------------|------------|-----------|-----|
| gii13518009 gb AAK29088.1    | KLISYTLPPVV | QSGSGTCITDP | LLAMDEGYFA | YSHLERIGSC | SRGVSQR I | 250 |
| gii15487369 gb AAK50545.1    | KLISYTLPPVV | QSGSGTCITDP | LLAMDEGYFA | YSHLERIGSC | SRGVSQR I | 250 |
| gii15487379 gb AAK50554.1    | KLISYTLPPVV | QSGSGTCITDP | LLAMDEGYFA | YSHLERIGSC | SRGVSQR I | 250 |
| gii20152868 gb AAM13406.1    | KLISYTLPPVV | QSGSGTCITDP | LLAMDEGYFA | YSHLERIGSC | SRGVSQR I | 250 |
| gii40644703 emb CAD92351.1   | KLISYTLPPVV | QSGSGTCITDP | LLAMDEGYFA | YSHLERIGSC | SRGVSQR I | 250 |
| gii40644710 emb CAD92357.1   | KLISYTLPPVV | QSGSGTCITDP | LLAMDEGYFA | YSHLERIGSC | SRGVSQR I | 250 |
| gii40644717 emb CAD92363.1   | KLISYTLPPVV | QSGSGTCITDP | LLAMDEGYFA | YSHLERIGSC | SRGVSQR I | 250 |
| gii13559814 ref NP_112027.1  | KLISYTLPPVV | QSGSGTCITDP | LLAMDEGYFA | YSHLERIGSC | SRGVSQR I | 250 |
| gii57282813 emb CAF25497.1   | KLISYTLPPVV | QSGSGTCITDP | LLAMDEGYFA | YSHLERIGSC | SRGVSQR I | 250 |
| gii307557085 gb ADN51995.1   | KLISYTLPPVV | QSGSGTCITDP | LLAMDEGYFA | YSHLERIGSC | SRGVSQR I | 250 |
| gii1313476293 emb CBM41034.1 | KLISYTLPPVV | QSGSGTCITDP | LLAMDEGYFA | YSHLERIGSC | SRGVSQR I | 250 |
| gii66271898 gb AAY43916.1    | KLISYTLPPVV | QSGSGTCITDP | LLAMDEGYFA | YSHLEKIGSC | SRGVSQR I | 250 |
| gii374256950 gb AEZ01382.1   | KLISYTLPPVV | QSGSGTCITDP | LLAMDEGYFA | YSHLEKIGSC | SRGVSQR I | 250 |
| gii374256958 gb AEZ01389.1   | KLISYTLPPVV | QSGSGTCITDP | LLAMDEGYFA | YSHLEKIGSC | SRGVSQR I | 250 |
| gii253559848 gb ACT32615.1   | KLISYTLPPVV | QSGSGTCITDP | LLAMDEGYFA | YSHLEKIGSC | SRGVSQR I | 250 |
| gii374256967 gb AEZ01397.1   | KLISYTLPPVV | QSGSGTCITDP | LLAMDEGYFA | YSHLEKIGSC | SRGVSQR I | 250 |
| gii357640965 gb AET87354.1   | -----YFA    | -----YFA    | -----YFA   | YSHLEKIGSC | SRGVSQR I | 23  |

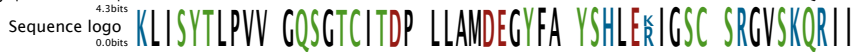

260 280 300

|                              |            |            |            |            |             |     |
|------------------------------|------------|------------|------------|------------|-------------|-----|
| gii13518009 gb AAK29088.1    | GVGEVLDGRD | EVPSLFMTNV | WTPPNPNTVY | HCSAVYNNEF | YYVLCVAVSTV | 300 |
| gii15487369 gb AAK50545.1    | GVGEVLDGRD | EVPSLFMTNV | WTPPNPNTVY | HCSAVYNNEF | YYVLCVAVSTV | 300 |
| gii15487379 gb AAK50554.1    | GVGEVLDGRD | EVPSLFMTNV | WTPPNPNTVY | HCSAVYNNEF | YYVLCVAVSTV | 300 |
| gii20152868 gb AAM13406.1    | GVGEVLDGRD | EVPSLFMTNV | WTPPNPNTVY | HCSAVYNNEF | YYVLCVAVSTV | 300 |
| gii40644703 emb CAD92351.1   | GVGEVLDGRD | EVPSLFMTNV | WTPPNPNTVY | HCSAVYNNEF | YYVLCVAVSTV | 300 |
| gii40644710 emb CAD92357.1   | GVGEVLDGRD | EVPSLFMTNV | WTPPNPNTVY | HCSAVYNNEF | YYVLCVAVSTV | 300 |
| gii40644717 emb CAD92363.1   | GVGEVLDGRD | EVPSLFMTNV | WTPPNPNTVY | HCSAVYNNEF | YYVLCVAVSTV | 300 |
| gii13559814 ref NP_112027.1  | GVGEVLDGRD | EVPSLFMTNV | WTPPNPNTVY | HCSAVYNNEF | YYVLCVAVSTV | 300 |
| gii57282813 emb CAF25497.1   | GVGEVLDGRD | EVPSLFMTNV | WTPPNPNTVY | HCSAVYNNEF | YYVLCVAVSTV | 300 |
| gii307557085 gb ADN51995.1   | GVGEVLDGRD | EVPSLFMTNV | WTPPNPNTVY | HCSAVYNNEF | YYVLCVAVSTV | 300 |
| gii1313476293 emb CBM41034.1 | GVGEVLDGRD | EVPSLFMTNV | WTPPNPNTVY | HCSAVYNNEF | YYVLCVAVSTV | 300 |
| gii66271898 gb AAY43916.1    | GVGEVLDGRD | EVPSLFMTNV | WTPSNPNTVY | HCSAVYNNEF | YYVLCVAVSV  | 300 |
| gii374256950 gb AEZ01382.1   | GVGEVLDGRD | EVPSLFMTNV | WTPSNPNTVY | HCSAVYNNEF | YYVLCVAVSV  | 300 |
| gii374256958 gb AEZ01389.1   | GVGEVLDGRD | EVPSLFMTNV | WTPSNPNTVY | HCSAVYNNEF | YYVLCVAVSV  | 300 |
| gii253559848 gb ACT32615.1   | GVGEVLDGRD | EVPSLFMTNV | WTPSNPNTVY | HCSAVYNNEF | YYVLCVAVSV  | 300 |
| gii374256967 gb AEZ01397.1   | GVGEVLDGRD | EVPSLFMTNV | WTPSNPNTVY | HCSAVYNNEF | YYVLCVAVSV  | 300 |
| gii357640965 gb AET87354.1   | GVGEVLDGRD | EVPSLFMTNV | WTPSNPNTVY | HCSAVYNNEF | YYVLCVAVSV  | 73  |

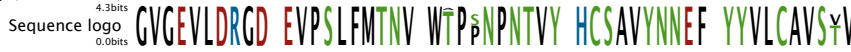

320 340

|                              |             |            |            |            |            |     |
|------------------------------|-------------|------------|------------|------------|------------|-----|
| gii13518009 gb AAK29088.1    | GDPI LNSTYW | SGSLMMTRLA | VKPKSNGGGY | NQHQLALRSI | EKGRYDKVMP | 350 |
| gii15487369 gb AAK50545.1    | GDPI LNSTYW | SGSLMMTRLA | VKPKSNGGGY | NQHQLALRSI | EKGRYDKVMP | 350 |
| gii15487379 gb AAK50554.1    | GDPI LNSTYW | SGSLMMTRLA | VKPKSNGGGY | NQHQLALRSI | EKGRYDKVMP | 350 |
| gii20152868 gb AAM13406.1    | GDPI LNSTYW | SGSLMMTRLA | VKPKSNGGGY | NQHQLALRSI | EKGRYDKVMP | 350 |
| gii40644703 emb CAD92351.1   | GDPI LNSTYW | SGSLMMTRLA | VKPKSNGGGY | NQHQLALRSI | EKGRYDKVMP | 350 |
| gii40644710 emb CAD92357.1   | GDPI LNSTYW | SGSLMMTRLA | VKPKSNGGGY | NQHQLALRSI | EKGRYDKVMP | 350 |
| gii40644717 emb CAD92363.1   | GDPI LNSTYW | SGSLMMTRLA | VKPKSNGGGY | NQHQLALRSI | EKGRYDKVMP | 350 |
| gii13559814 ref NP_112027.1  | GDPI LNSTYW | SGSLMMTRLA | VKPKSNGGGY | NQHQLALRSI | EKGRYDKVMP | 350 |
| gii57282813 emb CAF25497.1   | GDPI LNSTYW | SGSLMMTRLA | VKPKSNGGGY | NQHQLALRSI | EKGRYDKVMP | 350 |
| gii307557085 gb ADN51995.1   | GDPI LNSTYW | SGSLMMTRLA | VKPKSNGGGY | NQHQLALRSI | EKGRYDKVMP | 350 |
| gii1313476293 emb CBM41034.1 | GDPI LNSTYW | SGSLMMTRLA | VKPKSNGGGY | NQHQLALRSI | EKGRYDKVMP | 350 |
| gii66271898 gb AAY43916.1    | GDPI LNSTYW | SGSLMMTRLA | VKPKNNGESY | NQHQLALRSI | EKGRYDKVMP | 350 |
| gii374256950 gb AEZ01382.1   | GDPI LNSTYW | SGSLMMTRLA | VKPKNNGESY | NQHQLALRSI | EKGRYDKVMP | 350 |
| gii374256958 gb AEZ01389.1   | GDPI LNSTYW | SGSLMMTRLA | VKPKNNGESY | NQHQLALRSI | EKGRYDKVMP | 350 |
| gii253559848 gb ACT32615.1   | GDPI LNSTYW | SGSLMMTRLA | VKPKNNGESY | NQHQLALRSI | EKGRYDKVMP | 350 |
| gii374256967 gb AEZ01397.1   | GDPI LNSTYW | SGSLMMTRLA | VKPKNNGESY | NQHQLALRSI | EKGRYDKVMP | 350 |
| gii357640965 gb AET87354.1   | GDPI LNSTYW | SGSLMMTRLA | VKPKNNGESY | NQHQLALRSI | EKGRYDKVMP | 123 |

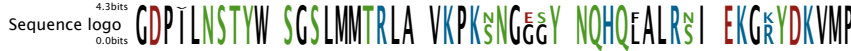

360 380 400

|                              |              |            |             |              |              |     |
|------------------------------|--------------|------------|-------------|--------------|--------------|-----|
| gii13518009 gb AAK29088.1    | YGPSG I KQGD | TLYFPAVGFL | VRTEFKYND S | NCP I TKCQYS | KPENCR L SMG | 400 |
| gii15487369 gb AAK50545.1    | YGPSG I KQGD | TLYFPAVGFL | VRTEFKYND S | NCP I TKCQYS | KPENCR L SMG | 400 |
| gii15487379 gb AAK50554.1    | YGPSG I KQGD | TLYFPAVGFL | VRTEFKYND S | NCP I TKCQYS | KPENCR L SMG | 400 |
| gii20152868 gb AAM13406.1    | YGPSG I KQGD | TLYFPAVGFL | VRTEFKYND S | NCP I TKCQYS | KPENCR L SMG | 400 |
| gii40644703 emb CAD92351.1   | YGPSG I KQGD | TLYFPAVGFL | VRTEFKYND S | NCP I TKCQYS | KPENCR L SMG | 400 |
| gii40644710 emb CAD92357.1   | YGPSG I KQGD | TLYFPAVGFL | VRTEFKYND S | NCP I TKCQYS | KPENCR L SMG | 400 |
| gii40644717 emb CAD92363.1   | YGPSG I KQGD | TLYFPAVGFL | VRTEFKYND S | NCP I TKCQYS | KPENCR L SMG | 400 |
| gii13559814 ref NP_112027.1  | YGPSG I KQGD | TLYFPAVGFL | VRTEFKYND S | NCP I TKCQYS | KPENCR L SMG | 400 |
| gii57282813 emb CAF25497.1   | YGPSG I KQGD | TLYFPAVGFL | VRTEFKYND S | NCP I TKCQYS | KPENCR L SMG | 400 |
| gii307557085 gb ADN51995.1   | YGPSG I KQGD | TLYFPAVGFL | VRTEFKYND S | NCP I TKCQYS | KPENCR L SMG | 400 |
| gii1313476293 emb CBM41034.1 | YGPSG I KQGD | TLYFPAVGFL | VRTEFKYND S | NCP I TKCQYS | KPENCR L SMG | 400 |
| gii66271898 gb AAY43916.1    | YGPSG I KQGD | TLYFPAVGFL | VRTEFKYND S | NCP I AECQYS | KPENCR L SMG | 400 |
| gii374256950 gb AEZ01382.1   | YGPSG I KQGD | TLYFPAVGFL | VRTEFKYND S | NCP I AECQYS | KPENCR L SMG | 400 |
| gii374256958 gb AEZ01389.1   | YGPSG I KQGD | TLYFPAVGFL | VRTEFKYND S | NCP I AECQYS | KPENCR L SMG | 400 |
| gii253559848 gb ACT32615.1   | YGPSG I KQGD | TLYFPAVGFL | VRTEFKYND S | NCP I AECQYS | KPENCR L SMG | 400 |
| gii374256967 gb AEZ01397.1   | YGPSG I KQGD | TLYFPAVGFL | VRTEFKYND S | NCP I AECQYS | KPENCR L SMG | 400 |
| gii357640965 gb AET87354.1   | YGPSG I KQGD | TLYFPAVGFL | VRTEFKYND S | NCP I AECQYS | KPENCR L SMG | 173 |

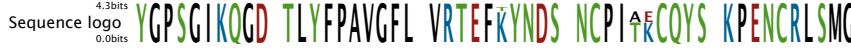

420 440

gii13518009|gb|AAK29088.1| IRPN SHY I LR SGL LKYN L SD GENPKVVF I E ISDQRLS I GS PSK I YDSL GQ 450  
 gii15487369|gb|AAK50545.1| IRPN SHY I LR SGL LKYN L SD GENPKVVF I E ISDQRLS I GS PSK I YDSL GQ 450  
 gii15487379|gb|AAK50554.1| IRPN SHY I LR SGL LKYN L SD GENPKVVF I E ISDQRLS I GS PSK I YDSL GQ 450  
 gii20152868|gb|AAM13406.1| IRPN SHY I LR SGL LKYN L SD GENPKVVF I E ISDQRLS I GS PSK I YDSL GQ 450  
 gii40644703|emb|CAD92351.1| IRPN SHY I LR SGL LKYN L SD GENPKVVF I E ISDQRLS I GS PSK I YDSL GQ 450  
 gii40644710|emb|CAD92357.1| IRPN SHY I LR SGL LKYN L SD GENPKVVF I E ISDQRLS I GS PSK I YDSL GQ 450  
 gii40644717|emb|CAD92363.1| IRPN SHY I LR SGL LKYN L SD GENPKVVF I E ISDQRLS I GS PSK I YDSL GQ 450  
 gii13559814|ref|NP\_112027.1| IRPN SHY I LR SGL LKYN L SD GENPKVVF I E ISDQRLS I GS PSK I YDSL GQ 450  
 gii57282813|emb|CAF25497.1| IRPN SHY I LR SGL LKYN L SD GENPKVVF I E ISDQRLS I GS PSK I YDSL GQ 450  
 gii307557085|gb|ADN51995.1| IRPN SHY I LR SGL LKYN L SD GENPKVVF I E ISDQRLS I GS PSK I YDSL GQ 450  
 gii1313476293|emb|CBM41034.1| IRPN SHY I LR SGL LKYN L SD GENPKVVF I E ISDQRLS I GS PSK I YDSL GQ 450  
 gii66271898|gb|AAY43916.1| IRPN SHY I LR SGL LKYN L SD EEN SK I VF I E ISDQRLS I GS PSK I YDSL GQ 450  
 gii374256950|gb|AEZ01382.1| IRPN SHY I LR SGL LKYN L SD EEN SK I VF I E ISDQRLS I GS PSK I YDSL GQ 450  
 gii374256958|gb|AEZ01389.1| IRPN SHY I LR SGL LKYN L SD EEN SK I VF I E ISDQRLS I GS PSK I YDSL GQ 450  
 gii253559848|gb|ACT32615.1| IRPN SHY I LR SGL LKYN L SD EEN SK I VF I E ISDQRLS I GS PSK I YDSL GQ 450  
 gii374256967|gb|AEZ01397.1| IRPN SHY I LR SGL LKYN L SD EEN SK I VF I E ISDQRLS I GS PSK I YDSL GQ 450  
 gii357640965|gb|AET87354.1| IRPN SHY I LR SGL LKYN L SD EEN SK I VF I E ISDQRLS I GS PSK I YDSL GQ 223

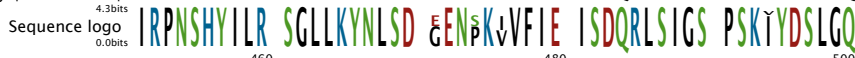

460 480 500

gii13518009|gb|AAK29088.1| PVFYQAS F SW DTM I KFGDVL TVNPLVVNWR NNTV I SRPGQ SQCPRFNTCP 500  
 gii15487369|gb|AAK50545.1| PVFYQAS F SW DTM I KFGDVL TVNPLVVNWR NNTV I SRPGQ SQCPRFNTCP 500  
 gii15487379|gb|AAK50554.1| PVFYQAS F SW DTM I KFGDVL TVNPLVVNWR NNTV I SRPGQ SQCPRFNTCP 500  
 gii20152868|gb|AAM13406.1| PVFYQAS F SW DTM I KFGDVL TVNPLVVNWR NNTV I SRPGQ SQCPRFNTCP 500  
 gii40644703|emb|CAD92351.1| PVFYQAS F SW DTM I KFGDVL TVNPLVVNWR NNTV I SRPGQ SQCPRFNTCP 500  
 gii40644710|emb|CAD92357.1| PVFYQAS F SW DTM I KFGDVL TVNPLVVNWR NNTV I SRPGQ SQCPRFNTCP 500  
 gii40644717|emb|CAD92363.1| PVFYQAS F SW DTM I KFGDVL TVNPLVVNWR NNTV I SRPGQ SQCPRFNTCP 500  
 gii13559814|ref|NP\_112027.1| PVFYQAS F SW DTM I KFGDVL TVNPLVVNWR NNTV I SRPGQ SQCPRFNTCP 500  
 gii57282813|emb|CAF25497.1| PVFYQAS F SW DTM I KFGDVL TVNPLVVNWR NNTV I SRPGQ SQCPRFNTCP 500  
 gii307557085|gb|ADN51995.1| PVFYQAS F SW DTM I KFGDVL TVNPLVVNWR DNTV I SRPGQ SQCPRFNTCP 500  
 gii1313476293|emb|CBM41034.1| PVFYQAS F SW DTM I KFGDVL TVNPLVVNWR DNTV I SRPGQ SQCPRFNTCP 500  
 gii66271898|gb|AAY43916.1| PVFYQAS F SW DTM I KFGDVL TVNPLVVNWR DNTV I SRPGQ SQCPRFNTCP 500  
 gii374256950|gb|AEZ01382.1| PVFYQAS F SW DTM I KFGDVL TVNPLVVNWR DNTV I SRPGQ SQCPRFNTCP 500  
 gii374256958|gb|AEZ01389.1| PVFYQAS F SW DTM I KFGDVL TVNPLVVNWR DNTV I SRPGQ SQCPRFNTCP 500  
 gii253559848|gb|ACT32615.1| PVFYQAS F SW DTM I KFGDVL TVNPLVVNWR DNTV I SRPGQ SQCPRFNTCP 500  
 gii374256967|gb|AEZ01397.1| PVFYQAS F SW DTM I KFGDVL TVNPLVVNWR DNTV I SRPGQ SQCPRFNTCP 500  
 gii357640965|gb|AET87354.1| PVFYQAS F SW DTM I KFGDVL TVNPLVVNWR DNTV I SRPGQ SQCPRFNTCP 273

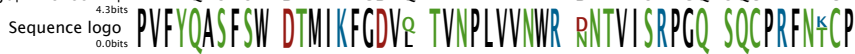

520 540 560

gii13518009|gb|AAK29088.1| E I CWEGVYND AFL I DR I NW I SAGVFLDSNQ TAENPVFTVF KDNE I LYRAQ 550  
 gii15487369|gb|AAK50545.1| E I CWEGVYND AFL I DR I NW I SAGVFLDSNQ TAENPVFTVF KDNE I LYRAQ 550  
 gii15487379|gb|AAK50554.1| E I CWEGVYND AFL I DR I NW I SAGVFLDSNQ TAENPVFTVF KDNE I LYRAQ 550  
 gii20152868|gb|AAM13406.1| E I CWEGVYND AFL I DR I NW I SAGVFLDSNQ TAENPVFTVF KDNE I LYRAQ 550  
 gii40644703|emb|CAD92351.1| E I CWEGVYND AFL I DR I NW I SAGVFLDSNQ TAENPVFTVF KDNE I LYRAQ 550  
 gii40644710|emb|CAD92357.1| E I CWEGVYND AFL I DR I NW I SAGVFLDSNQ TAENPVFTVF KDNE I LYRAQ 550  
 gii40644717|emb|CAD92363.1| E I CWEGVYND AFL I DR I NW I SAGVFLDSNQ TAENPVFTVF KDNE I LYRAQ 550  
 gii13559814|ref|NP\_112027.1| E I CWEGVYND AFL I DR I NW I SAGVFLDSNQ TAENPVFTVF KDNE I LYRAQ 550  
 gii57282813|emb|CAF25497.1| E I CWEGVYND AFL I DR I NW I SAGVFLDSNQ TAENPVFTVF KDNE I LYRAQ 550  
 gii307557085|gb|ADN51995.1| E I CWEGVYND AFL I DR I NW I SAGVFLDSNQ TAENPVFTVF KDNE I LYRAQ 550  
 gii1313476293|emb|CBM41034.1| E I CWEGVYND AFL I DR I NW I SAGVFLDSNQ TAENPVFTVF KDNE I LYRAQ 550  
 gii66271898|gb|AAY43916.1| EVCWEGVYND AFL I DR I NW I SAGVFLDSNQ TAENPVFTVF KDNEVLYRAQ 550  
 gii374256950|gb|AEZ01382.1| EVCWEGVYND AFL I DR I NW I SAGVFLDSNQ TAENPVFTVF KDNEVLYRAQ 550  
 gii374256958|gb|AEZ01389.1| EVCWEGVYND AFL I DR I NW I SAGVFLDSNQ TAENPVFTVF KDNEVLYRAQ 550  
 gii253559848|gb|ACT32615.1| EVCWEGVYND AFL I DR I NW I SAGVFLDSNQ TAENPVFTVF KDNEVLYRAQ 550  
 gii374256967|gb|AEZ01397.1| EVCWEGVYND AFL I DR I NW I SAGVFLDSNQ TAENPVFTVF KDNEVLYRAQ 550  
 gii357640965|gb|AET87354.1| EVCWEGVYND AFL I DR I NW I SAGVFLDSNQ TAENPVFTVF KDNEVLYRAQ 318

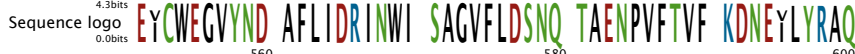

560 580 600

gii13518009|gb|AAK29088.1| LASEDTNAQK T I TNCFL LKN K I WC I SLVE I YDTGDNV I RP KLF AVK I PEQ 600  
 gii15487369|gb|AAK50545.1| LASEDTNAQK T I TNCFL LKN K I WC I SLVE I YDTGDNV I RP KLF AVK I PEQ 600  
 gii15487379|gb|AAK50554.1| LASEDTNAQK T I TNCFL LKN K I WC I SLVE I YDTGDNV I RP KLF AVK I PEQ 600  
 gii20152868|gb|AAM13406.1| LASEDTNAQK T I TNCFL LKN K I WC I SLVE I YDTGDNV I RP KLF AVK I PEQ 600  
 gii40644703|emb|CAD92351.1| LASEDTNAQK T I TNCFL LKN K I WC I SLVE I YDTGDNV I RP KLF AVK I PEQ 600  
 gii40644710|emb|CAD92357.1| LASEDTNAQK T I TNCFL LKN K I WC I SLVE I YDTGDNV I RP KLF AVK I PEQ 600  
 gii40644717|emb|CAD92363.1| LASEDTNAQK T I TNCFL LKN K I WC I SLVE I YDTGDNV I RP KLF AVK I PEQ 600  
 gii13559814|ref|NP\_112027.1| LASEDTNAQK T I TNCFL LKN K I WC I SLVE I YDTGDNV I RP KLF AVK I PEQ 600  
 gii57282813|emb|CAF25497.1| LASEDTNAQK T I TNCFL LKN K I WC I SLVE I YDTGDNV I RP KLF AVK I PEQ 600  
 gii307557085|gb|ADN51995.1| LASEDTNAQK T I TNCFL LKN K I WC I SLVE I YDTGDNV I RP KLF AVK I PEQ 600  
 gii1313476293|emb|CBM41034.1| LASEDTNAQK T I TNCFL LKN K I WC I SLVE I YDTGDNV I RP KLF AVK I PEQ 600  
 gii66271898|gb|AAY43916.1| LASEDTNAQK T I TNCFL LKN K I WC I SLVE I YDTGDNV I RP KLF AVK I PEQ 600  
 gii374256950|gb|AEZ01382.1| LASEDTNAQK T I TNCFL LKN K I WC I SLVE I YDTGDNV I RP KLF AVK I PEQ 600  
 gii374256958|gb|AEZ01389.1| LASEDTNAQK T I TNCFL LKN K I WC I SLVE I YDTGDNV I RP KLF AVK I PEQ 600  
 gii253559848|gb|ACT32615.1| LASEDTNAQK T I TNCFL LKN K I WC I SLVE I YDTGDNV I RP KLF AVK I PEQ 600  
 gii374256967|gb|AEZ01397.1| LASEDTNAQK T I TNCFL LKN K I WC I SLVE I YDTGDNV I RP KLF AVK I PEQ 600  
 gii357640965|gb|AET87354.1| LASEDTNAQK T I TNCFL LKN K I WC I SLVE I YDTGDNV I RP KLF AVK I PEQ 318

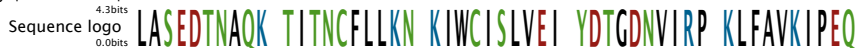

gjl13518009|gb|AAK29088.1| CT 602  
 gjl15487369|gb|AAK50545.1| CT 602  
 gjl15487379|gb|AAK50554.1| CT 602  
 gjl20152868|gb|AAM13406.1| CT 602  
 gjl40644703|emb|CAD92351.1| CT 602  
 gjl40644710|emb|CAD92357.1| CT 602  
 gjl40644717|emb|CAD92363.1| CT 602  
 gjl13559814|ref|NP\_112027.1| CT 602  
 gjl57282813|emb|CAF25497.1| CT 602  
 gjl307557085|gb|ADN51995.1| CT 602  
 gjl313476293|emb|CBM41034.1| CT 602  
 gjl66271898|gb|AAY43916.1| CT 602  
 gjl374256950|gb|AEZ01382.1| CT 602  
 gjl374256958|gb|AEZ01389.1| CT 602  
 gjl253559848|gb|ACT32615.1| CT 602  
 gjl374256967|gb|AEZ01397.1| CT 602  
 gjl357640965|gb|AET87354.1| -- 318

Sequence logo   
 4.3bits  
 0.0bits
